# Supplementary material
Source: ML conference proceedings conference paper supplement (https://openaccess.thecvf.com/content/CVPR2022/html/Liu_Non-Iterative_Recovery_From_CVPR_2022_paper.html)
Supplement: Supplementary file 1 [file 07082-code.pdf › 07082-code.pdf]

## **The Link for the Code for “Non-Iterative Recovery from Nonlinear Observations using Generative Models”**

Since the file size is large, we only provide the link for our code:

<https://github.com/jiulongliu/oneshot>
